1  
2  
3  
4  
5  
6  
7  
8  
9  
10  
11  
12  
13  
14  
15  
16  
17  
18  
19  
20  
21  
22  
23

Life under quartz: Hypolithic mosses in the Mojave Desert

Jenna T. B. Ekwealor<sup>1\*</sup> and Kirsten M. Fisher<sup>2</sup>

<sup>2</sup>Department of Biological Sciences, California State University, Los Angeles, California, United States of America

<sup>1</sup>Department of Integrative Biology, University of California, Berkeley, California, United States of America

\*Corresponding author

E-mail: jtbe@berkeley.edu (JE)

## 24 **Abstract**

25 Several species of dryland cyanobacteria are known to occur as hypoliths under semi-translucent  
26 rocks. In the Mojave Desert, these organisms find refuge from intense solar radiation under  
27 milky quartz where moisture persists for a longer period of time than in adjacent soil surface  
28 habitat. Desert mosses, which are extremely desiccation-tolerant, can also occur in these  
29 hypolithic spaces, though little is known about this unique moss microhabitat and how species  
30 composition compares to that of adjacent soil surface communities. To address this question, we  
31 deployed microclimate dataloggers and collected moss samples from under and adjacent to 18  
32 milky quartz rocks (quartz mean center thickness  $26 \pm 15$  mm) in a western high elevation  
33 Mojave Desert site. Light transmission through Mojave quartz rocks may be as low as 1.2%, and  
34 data from microclimate loggers deployed for five months support the hypothesis that quartz  
35 provides thermal buffering and higher relative humidity compared to the soil surface. Of the 53  
36 samples collected from hypolith and surface microhabitats, 68% were *Syntrichia caninervis*, the  
37 dominant bryophyte of the Mojave Desert biological soil crust. *Tortula inermis* accounted for  
38 28% of the samples and 4% were *Bryum argenteum*. In a comparison of moss community  
39 composition, we found that *S. caninervis* was more likely to be on the soil surface, though it was  
40 abundant in both microhabitats, while *T. inermis* was more restricted to hypoliths, perhaps due to  
41 protection from temperature extremes. In our study site, the differences between hypolithic and  
42 surface microhabitats enable niche partitioning between *T. inermis* and *S. caninervis*, enhancing  
43 alpha diversity. This work points to the need to thoroughly consider microhabitats when  
44 assessing bryophyte species diversity and modelling species distributions. This focus is  
45 particularly important in extreme environments, where mosses may find refuge from the  
46 prevailing macroclimatic conditions in microhabitats such as hypoliths.

47

## 48 **Keywords**

49 *Syntrichia caninervis*, *Tortula inermis*, microclimate, moss community, climate buffering,  
50 bryophyte ecology, hypolith, desert

51

## 52 **Introduction**

53 Competitive exclusion and habitat selection theory posit that differential habitat selection  
54 may permit organisms of similar phenotypes to coexist [1–3]. This phenomenon can be observed  
55 in spatial and temporal differentiation, both of which are well-documented in plants [4].  
56 Similarly, soil microorganisms exhibit habitat differentiation and resource partitioning,  
57 promoting species coexistence due to spatial heterogeneity [5]. Cryptobiosis, or dormancy, is  
58 common among soil microorganisms and can be understood as a form of temporal habitat  
59 differentiation, where organisms “occur” at different times in the same space. Biological soil  
60 crusts (biocrusts), communities of bryophytes, lichens, fungi, cyanobacteria, and other  
61 microorganisms living on the surface of the soil in deserts and drylands, exhibit impressive  
62 cryptobiosis [6]. Temporal partitioning is a critical strategy for these organisms, which may be  
63 desiccated and dormant for several consecutive months of each year. While many mosses are  
64 found in cool, low light environments, several species are abundant in deserts and drylands as  
65 important members of these biocrust communities.

66 As poikilohydric organisms, mosses equilibrate rapidly to ambient water content. This  
67 means that in the desert, which often experiences low humidity and high potential  
68 evapotranspiration, mosses can lose virtually all of their cellular free water and still resume

69 normal growth once rehydrated; a complex trait known as desiccation tolerance [7]. Some of the  
70 most desiccation tolerant plants are species in the genus *Syntrichia*, which represent dominant  
71 members of Mojave Desert biocrust communities. However, even within harsh macroclimates,  
72 desert mosses may find climate buffering and more temperate conditions in the  
73 microenvironments that they occupy. For example, mosses are effective dew collectors, an  
74 important water source in very arid climates [8].

75         Similarly, mosses occupy microhabitats that may experience dramatically different light  
76 environments than the macroenvironment might suggest. For instance, many desert mosses occur  
77 under the shade of larger vascular plants [9,10], where they can take advantage of variable light  
78 and brief sun flecks when hydrated. Still, mosses are often found in open, exposed spaces,  
79 experiencing intensity of sunlight far beyond their light saturation points [11]. Thus, during hot,  
80 dry summer months, exposed biocrust mosses experience intense solar radiation with no ability  
81 to actively repair damage caused by UV and excess photosynthetically active radiation (PAR).  
82 Furthermore, while dry, these mosses are unable to use any PAR for photosynthesis. While  
83 quiescent, though, desiccated mosses do have passive avoidance strategies. Most mosses exhibit  
84 leaf-curling when dry, a mechanism that may reduce direct sunlight on leaf lamina [12,13].  
85 Many desert mosses also have translucent leaf cells at the tips of their leaves, some even  
86 extending into long, hyaline awns, possibly reducing solar absorbance by increasing reflectance  
87 [12–14]. Furthermore, some mosses accumulate pigments such as carotenoids, anthocyanins, and  
88 UV-absorbing compounds such as flavonoids that may act as passive sunscreens [15–19].

89         Hypoliths are organisms that live under and on the belowground surface of translucent  
90 and opaque stones (typically quartz) that are embedded in the soil surface [20]. While they can  
91 occur anywhere suitable substrate is available, they are common in drylands [21], the largest

92 terrestrial biome. Hypoliths experience enhanced water availability relative to surrounding soil  
93 organisms due lower evaporation, higher relative humidity (RH), and capture of water via fog  
94 condensation [21]. Nonetheless, dryland hypolithic habitats are still colonized by poikilohydric  
95 organisms that must withstand extended periods without water [22]. Cyanobacteria are the most  
96 common and dominant organisms in hypolithic communities [21], particularly taxa from the  
97 genus *Chroococidiopsis* [23].

98 Moss can be observed growing adjacent to hypolithic cyanobacteria-harboring quartz  
99 rocks [20] and hypolithic communities may even be a necessary successional step for moss  
100 growth in some ecosystems [24,25]. Though less frequently, mosses also occur in hypolithic  
101 habitats, especially in extreme environments [20,26–29]. For instance, a single patch of *Tortula*  
102 *inermis* was reported under a crystalline rock in Death Valley [30], and there are additional  
103 reports of temperate hypolithic mosses [31], including an endemic obligate hypolith from Kansas  
104 in the Great Plains of the United States [32]. Overall, studies including hypolithic mosses are  
105 limited and there are even fewer that aim to characterize the hypolithic moss community within a  
106 local area. This work serves as an important addition to this understudied topic, which has the  
107 potential to extend understanding of habitat partitioning and drivers of moss species diversity in  
108 arid environments. The main objective of this study was to compare hypolithic and soil surface  
109 moss communities in a western Mojave Desert wash. Specifically, we aimed to (1) compare  
110 relevant physical characteristics to determine whether microclimatic conditions differ  
111 significantly between hypolithic and adjacent soil surface microhabitats, and (2) test whether  
112 species composition or growth characteristics differ in hypolithic and adjacent soil surface  
113 microhabitats.

114

## 115 **Methods**

### 116 **Site description & microclimate monitoring**

117           The Sheep Creek Wash Mojave Desert site was visited and sampled in June of 2014. The  
118 site is at 1900 m elevation at the west end of the Mojave Desert and the northern base of the San  
119 Gabriel Mountains near Wrightwood, CA (34°22'33.85"N, 117°36'34.59"W). The average high  
120 and low annual temperatures are 16.3 °C and 1.6 °C, respectively, with an average annual  
121 precipitation of 49.4 cm (2005-2009, Wrightwood Weather Station, NOAA National Climatic  
122 Data Center). Soil mosses in this rocky wash grow in a semi-continuous carpet (Figs 1A and 1B).  
123

124 **Fig 1. Field site and habitat of soil surface and hypolithic mosses at Sheep Creek Wash,**  
125 **Mojave Desert, CA.** (A) Vegetation and environment in the study site. (B) Mosses growing in a  
126 rocky, semi-continuous carpet. Moss growing on the soil surface near a milky quartz rock  
127 (indicated with arrow). (C) Sampling sites for hypolithic (white arrow) and adjacent soil surface  
128 (black arrow) microhabitats.

129  
130           In order to understand how the hypolithic microclimate compares to that of the surface,  
131 temperature and RH were measured with iButton hygrometers (Maxim Integrated, San Jose, CA,  
132 USA) from September 2019 to February 2020. One iButton was deployed under a quartz rock  
133 that had moss growing under it and the other on a nearby soil surface moss (within 1 m of the  
134 quartz rock). Data were recorded once every hour and were summarized to find the high and low  
135 temperatures and relative humidities of each day. Mean daily highs and lows from each  
136 microhabitat type (soil surface and hypolithic) were compared using the paired Student's T-test.

137 The difference in temperature and RH between surface and hypolithic microhabitats was  
138 calculated for each hourly time point. Differences in RH were binned into 20% bins, which were  
139 then used to calculate the proportion of total time that the difference in RH between  
140 microhabitats was greater than 10%.

141

## 142 **Light transmittance**

143 Average amount of 650 nm light transmittance through sampled quartz rocks was  
144 calculated with a Beer's Law equation for Mojave Desert quartz pebbles [33]. These estimates  
145 were tested empirically with Onset HOBO Pendant temperature & light data loggers (Onset  
146 Computer Corporation, Bourne, MA, USA) and two milky quartz rocks collected from the study  
147 site (approximately 10 mm and 25 mm thick at center) in a growth chamber and in outdoors in  
148 full sunlight.

149

## 150 **Sample collection**

151 Restriction of the hypolithic moss community to quartz rocks was first tested by pairing  
152 inspection under quartz rocks with inspection under non-quartz rocks of similar size within a 2 m  
153 x 2 m quadrat. To compare hypolithic and soil surface moss communities, samples were  
154 collected in approximately 0.5 cm clumps under and on the soil surface immediately adjacent to  
155 each quartz rock in a randomly selected 1 m x 1 m quadrat. Collection continued with sampling  
156 one quadrat every 3 m along two 15 m linear north-south (N-S) transects, 6 m apart from one  
157 another, for a total of 8 quadrats, 18 quartz rocks, and 53 moss samples. At the time of  
158 collection, quartz approximate thickness at center was measured to the nearest millimeter. Each

159 sample was stored air-dried in a plastic box for subsequent species identification and shoot  
160 measurements. Samples were collected under a USDA US Forest Service permit to K. Fisher.

161

## 162 **Species composition**

163 Shoots from each field collection were dissected and observed under dissecting and  
164 compound microscopes in both desiccated and hydrated states to identify to species using  
165 characteristic shoot morphology and leaf cross-sections [34–36]. Statistical difference between  
166 relative abundance of mosses in surface and hypolithic positions was tested with a  $3 \times 2$   
167 contingency table and Fisher's exact test [37].

168

## 169 **Shoot length & leaf density**

170 Each of 349 *Syntrichia caninervis* shoots ( $n_{\text{HYP}} = 50$ ,  $n_{\text{SUR}} = 299$ ) was placed under a  
171 dissecting microscope to be measured digitally using a calibrated Motic microscope and software  
172 (Motic, Hong Kong, China). Only the length of shoot containing living tissue was measured. The  
173 boundaries of living tissue were determined by identifying leaves that had chlorophyllose tissue  
174 or other uniform pigmentation and that remained relatively closed when dry. Dead tissue, on the  
175 other hand, comprised open, damaged leaves with faded or blotchy pigmentation. Shoot lengths  
176 were first tested for normality with a Shapiro test [38] and then compared with a Wilcoxon test  
177 [39].

178 Leaf density was approximated on a subset of shoots. One shoot per remaining moss  
179 sample was selected at random and dead tissue was removed as above. Shoots were rehydrated  
180 and leaves were carefully removed and counted. Stem lengths were measured, and leaf density



181 was calculated as number of leaves divided by stem length. Leaf density data were first tested for  
182 normality with a Shapiro test [38] and then compared with a Wilcoxon test [39].

183

## 184 **Results**

### 185 **Microclimate**

186 The mean daily high temperature on the soil surface was more than 2 °C warmer than in the  
187 hypolithic microhabitat under a quartz rock, while the mean daily low of the soil surface was  
188 almost 2 °C lower than the hypolithic space ( $P < 0.0001$ , Table 1). Over the microclimate  
189 monitoring period, soil surface temperatures were frequently warmer than the hypolithic  
190 microhabitat during the day and cooler at night (Fig 2). The quartz hypolithic microhabitat was  
191 slightly but consistently warmer during two periods of snow cover in November and December  
192 [40–43]. The mean daily low RH also differed between the soil surface and the hypolithic  
193 microhabitat. The mean daily low RH on the soil surface was 32.5% while in the hypolithic  
194 microhabitat under a quartz rock it was 62.5% ( $P < 0.001$ , Table 1). There was no significant  
195 difference in the mean daily high RH between the soil surface and the hypolithic microhabitat.  
196 During the first two months of microclimate monitoring, differences in RH were smaller in  
197 magnitude (within about 25%), with a general pattern of higher RH in the hypolithic  
198 microhabitat during the day and lower RH at night (Fig 3). However, from mid-November to end  
199 of February, RH was almost always higher in the hypolithic microhabitat, even at night. The  
200 times where RH was not higher under the quarts mostly correspond to two snow-covered periods  
201 [40–43] in which there was no difference in RH between the microhabitats. Over the monitoring  
202 period, 51.4% of the time RH was more than 10% higher in the hypolithic microhabitat  
203 compared to the soil surface. For 18.4% of the time, the hypolithic microhabitat was more than

204 10% lower in RH than on the soil surface, while 30.2% of the time the RH measurements in the  
205 two microhabitats were within 10% of each other.

206

207 **Fig 2. Difference in temperature (°C) between soil surface and hypolithic microhabitats in**  
208 **Sheep Creek Wash over five months.** The difference in temperature between Sheep Creek  
209 Wash soil surface and quartz hypolithic microhabitats measured hourly from September 2019 to  
210 February 2020. Temperature difference is calculated as surface temperature - hypolithic  
211 temperature. Light blue line indicates “day” hours, from 6 am – 6 pm PDT, while dark blue line  
212 indicates “night” (6 pm – 6 am PDT).

213

214 **Table 1. Microclimate in soil surface and hypolithic microhabitats from Sheep Creek**  
215 **Wash, Mojave Desert.**

|                                       | Surface     | Hypolithic  | <i>P</i> -value |
|---------------------------------------|-------------|-------------|-----------------|
| Mean daily low temperature (°C)       | 5.65 ± 5.03 | 7.98 ± 5.35 | < 0.001         |
| Mean daily high temperature (°C)      | 21.6 ± 12.8 | 18.9 ± 11.6 | < 0.001         |
| Mean daily low relative humidity (%)  | 32.5 ± 31.2 | 63.9 ± 39.5 | < 0.001         |
| Mean daily high relative humidity (%) | 71.7 ± 27.5 | 71.4 ± 34.9 | ns              |

Paired Student’s T-test, n = 158. ns = not significant.

216

217 **Fig 3. Difference in percent relative humidity between soil surface and hypolithic**  
218 **microhabitats in Sheep Creek Wash over five months.** The difference in relative humidity

219 (RH) between Sheep Creek Wash soil surface and quartz hypolithic microhabitats measured  
220 hourly from September 2019 to February 2020. RH difference is calculated as hypolithic RH -  
221 surface RH. Light blue line indicates “day” hours, from 6 am – 6 pm DST, while dark blue line  
222 indicates “night” (6 pm – 6 am DST).

223

## 224 **Quartz light transmittance**

225 The average thickness of 18 quartz rocks that harbored hypolithic mosses in our study  
226 was approximately  $26 \pm 15$  mm at the center, with rocks ranging from about 6 to 60 mm.  
227 According to the Beer’s law equation (1) of the line for transmission of 650 nm light as a  
228 function of Mojave Desert quartz thickness [33], only 0.065% of 650-nm light is transmitted  
229 through a 26 mm Mojave Desert milky quartz rock.

$$230 \quad \ln(\%T) = -0.261(t) + 3.961 \quad (1)$$

231 Average light transmittance for all 18 rocks that harbored hypolithic mosses in our study was  
232 found to be 1.2%,  $\sigma = 2.6\%$  using equation (1). According to our own measurements of light  
233 transmission through quartz collected from the study site, light intensity under a rock  
234 approximately 25 mm thick at center was 0.4% that of the exposed surface next to the rock.  
235 Under the 10 mm quartz rock, light was approximately 4% relative to surface intensity.

236

## 237 **Quartz restriction of hypoliths**

238 Eight of nine quartz rocks in a 2 m  $\times$  2 m quadrat harbored some hypolithic moss, while  
239 none of the nine similarly sized non-quartz rocks in the same quadrat had mosses growing  
240 underneath.

241

## 242 Moss community composition

243 Of the 53 hypolithic and surface samples, 36 (68%) were *S. caninervis*, 15 (28%) were *T.*  
244 *inermis*, and 2 (4%) were *Bryum argenteum*. *Tortula inermis* was significantly more likely to be  
245 found in hypolithic microenvironments, while *S. caninervis* was more abundant on adjacent soil  
246 surfaces (Table 2,  $P = 0.003$ ). Specifically, 24/36 (67%) of *S. caninervis* samples were found in  
247 soil surface positions adjacent to quartz rocks, and 12/15 (80%) of *T. inermis* were in hypolithic  
248 microhabitats (Figs 4A and 4B). Both samples of *B. argenteum*, a cosmopolitan weedy moss  
249 species, were found in soil surface microhabitats.

250

251 **Fig 4. Moss species from soil surface and hypolithic microhabitats in Mojave Desert Sheep**  
252 **Creek Wash.** (A) *Syntrichia caninervis* growing in both soil surface and milky quartz hypolithic  
253 microhabitats. (B) *Tortula inermis* (white arrow) and *S. caninervis* (black arrow) growing in a  
254 milky quartz hypolithic microhabitat.

255

256 **Table 2. Species composition and microhabitat contingency table.** Occurrences of *Syntrichia*  
257 *caninervis*, *Tortula inermis*, and *Bryum argenteum* under milky quartz rocks and on adjacent soil  
258 surface.

|            | <i>S. caninervis</i> | <i>T. inermis</i> | <i>B. argenteum</i> |
|------------|----------------------|-------------------|---------------------|
| Hypolithic | 12                   | 12                | 0                   |
| Surface    | 24                   | 3                 | 2                   |

Fisher's exact test;  $P = 0.003$ .

259

## 260 **Habitat-dependent shoot length & leaf density**

261 Hypolithic *S. caninervis* shoots were longer than soil surface shoots ( $P < 0.0001$ , Fig 5).

262 The length of living shoots from the soil surface was 1.21 mm on average, while hypolithic

263 shoots averaged 1.97, 62% longer than those collected from soil surface habitats. Hypolithic *S.*

264 *caninervis* shoots had a lower leaf density than those from the soil surface ( $P = 0.0125$ , Fig 7).

265 Shoots from hypolithic microhabitats had 16.5 leaves/mm on average, while soil surface shoots

266 had 28.7 leaves/mm.

267

### 268 **Fig 5. Differential shoot length in *Syntrichia caninervis* shoots from hypolithic and soil**

269 **surface microhabitats.** (A) Box plot of hypolithic and soil surface *S. caninervis* shoot length.

270 \*\*\*\* Wilcoxon test,  $P < 0.0001$ . Mean<sub>HYP</sub> = 2.0 mm, mean<sub>SUR</sub> = 1.2 mm; n<sub>HYP</sub> = 50, n<sub>SUR</sub> = 299.

271 (B) An *S. caninervis* shoot from a soil surface microhabitat. (C) An *S. caninervis* shoot from a

272 hypolithic microhabitat.

273

### 274 **Fig 6. Differential leaf density in *Syntrichia caninervis* shoots from hypolithic and soil**

275 **surface microhabitats.** Box plot of hypolithic and soil surface *S. caninervis* leaf density. \*

276 Wilcoxon test,  $P = 0.0125$ . Mean<sub>HYP</sub> = 16.5 leaves/mm, mean<sub>SUR</sub> = 28.7 leaves/mm; n<sub>HYP</sub> = 10,

277 n<sub>SUR</sub> = 23.

278

## 279 **Discussion**

280           In this high elevation western Mojave Desert site, the living shoot tissue of *S. caninervis*  
281 was longer when growing in hypolithic microhabitats compared to the soil surface (Fig 3) and  
282 had lower leaf density (Fig 4), perhaps due to lower light [44]. Hypolithic mosses experience  
283 much lower light intensity than mosses on the soil surface, less than 4% of surface light intensity.  
284 Previous studies have found an average range of 50-99% of ambient PAR intensity reaching  
285 hypolithic spaces [25,28,45,46]. At the low end, Beer's Law extrapolation from integrating  
286 sphere measurements of light transmittance through Mojave Desert quartz pebbles finds an  
287 average of just 1.18% light transmittance for all 18 quartz rocks that harbored hypolithic mosses  
288 in this study [33]. On the other hand, lower light intensity could also be a benefit, even to  
289 photosynthetic organisms such as mosses, by way of reduction of photobleaching and energy  
290 burden to dissipate excess light [47]. Light transmission through Mojave milky quartz is  
291 relatively constant across the visible region of the electromagnetic spectrum but increases  
292 slightly from 390 nm wavelengths to 1090 nm wavelengths (approximately the upper limit of  
293 ultraviolet light to the upper limit of infrared light). This suggests the possibility that not only is  
294 the hypolithic space a refuge from overall high light intensity but that hypoliths also experience a  
295 smaller proportion of damaging UV light relative to photosynthetically active radiation [47]. In  
296 fact, there is evidence that nearly all UV-A and UV-B radiation is filtered out before reaching  
297 hypolithic communities [25,28]. *Syntrichia caninervis* develops a dark brown or black coloration  
298 in natural environments, a phenotypically plastic trait that does not occur in low-light laboratory  
299 conditions and may represent a UV sunscreen. This pigmentation was reduced or absent in  
300 quartz hypolithic microhabitats, possibly caused by the drastically different light environment.  
301 Interestingly, UV-B tolerance in mosses seems to correlate with desiccation tolerance [48] and *S.*

302 *caninervis*, being one of the most desiccation-tolerant plants known, may also be expected to  
303 have high UV tolerance, too. Indeed, a close relative of this species, the also highly desiccation-  
304 tolerant *S. ruralis*, is not damaged by UV-B radiation, at least based on chlorophyll fluorescence  
305 [48].

306 Hypolithic *S. caninervis* plants may also be growing more, and thus have longer shoots,  
307 due to increased moisture retention resulting in an extended growing season relative to the  
308 adjacent soil surface [21] (Table 1). In this study, the area under quartz rocks was moist to the  
309 touch and the mosses were hydrated two weeks post-rain (assessed May 11, 2014; 0.51 mm rain  
310 at nearby Palmdale Airport on April 26, 2014; month-to-date rain: 10.9 mm). Microclimate  
311 monitoring found the soil surface to have a mean daily low RH much lower than in the adjacent  
312 hypolithic microhabitat (Table 1). Furthermore, we saw strong seasonal effects in RH differences  
313 between the microhabitats. In the warmer months, differences were smaller in magnitude and  
314 varied diurnally, with daytime having higher RH under quartz and night having higher RH on the  
315 soil surface. However, in winter the quartz hypolithic microhabitat almost always had higher RH  
316 than the soil surface. These data suggest the hypolithic spaces may act as a buffer to desiccation  
317 due to reduced evapotranspiration [27,49]. In contrast, desert soil surface mosses may desiccate  
318 within a day after a rainfall [50,51], even in as few as three hours [52]. The longest reported  
319 hydroperiod (time of complete hydration) for a Mojave Desert moss is 17 days, though most  
320 range between 1 and 4 days [52]. We found that nearly half of the monitoring period, the RH of  
321 hypolithic microhabitat was more than 10% higher than the soil surface, suggesting hypolithic  
322 mosses may be able take advantage of longer hydroperiods with more favorable RH. Indeed,  
323 hypolithic mosses receive very little light and would presumably need longer hydroperiods in  
324 order to take advantage of it. Longer hydroperiods not only allow mosses to remain

325 photosynthetically active for a longer period of time, but overly brief periods of water  
326 availability may actually cause damage to desert mosses in the form of respiratory carbon deficit  
327 [53]. Similarly, soil moisture is higher under quartz in Antarctica [54], due in part to the  
328 tendency of meltwater draining around the edges of rocks and exposure of surface soil to wind  
329 drying [26].

330 Hypolithic microhabitats may also be providing refuge from extreme temperature  
331 fluctuations that are common in the Mojave Desert. Previous studies have reported hypolithic  
332 spaces to be up to 10 °C warmer than ambient air temperatures [33,54], even preventing freezing  
333 in winter. However, in at least one case, lower temperatures were reported under quartz rocks  
334 [26]. These apparently conflicting results may be due to thermal inertia of the rocks causing a lag  
335 in temperature changes [26]. In other words, after heating over the course of a day, quartz will  
336 cool off more slowly than the air, potentially preventing freezing in hypolithic spaces.  
337 Correspondingly, hypolithic spaces experience a slower rate of heating, potentially resulting in  
338 lower temperatures under rocks relative to adjacent surface or ambient air temperatures as  
339 temperatures rise. This thermal buffering results in less daily temperature variation in hypolithic  
340 habitats than in surrounding surface habitats, a phenomenon also seen in hypolithic microbial  
341 systems [27,46,55], which may also facilitate moss shoot growth under quartz. Microclimate  
342 monitoring in this study supports this hypothesis. As seen in Table 1, mean daily high  
343 temperatures were lower in hypolithic microhabitats while mean daily low temperatures were  
344 higher in hypolithic microhabitats. Furthermore, we found a strong diurnal effect on temperature  
345 differences between the two microhabitats. During the day, temperatures were higher on the soil  
346 surface but at night, it was frequently warmer under the quartz, further suggesting quartz  
347 provides buffering from temperature extremes.



348           Because they lack roots, mosses rely upon external deposition and subsequent absorption  
349 of essential nutrients such as nitrogen and phosphorus [56]. In hypolithic spaces, mosses might  
350 experience limited access to nutrients typically acquired via atmospheric deposition, especially in  
351 ecosystems with low soil fertility like deserts. In both cold and hot deserts, hypoliths typically  
352 harbor a suite of cyanobacteria, but these taxa lack significant nitrogen fixation capacity [57,58].  
353 When diazotrophic activity is present in hypoliths, it is generally accomplished by Proteobacteria  
354 [57]. Thus, despite the negative relationship between moss presence and cyanobacterial  
355 abundance in hypoliths [59], mosses growing in hypolithic niches could potentially acquire  
356 nitrogen from non-cyanobacterial diazotrophs.

357           Hypolithic moss species composition was distinct from soil surface species composition,  
358 with a higher prevalence of *T. inermis*. *Tortula inermis* typically occurs at lower elevations of the  
359 Mojave Desert than *S. caninervis*, which suggests that this species is adapted to hotter and drier  
360 conditions than *S. caninervis* [50]. In our study, *T. inermis* was much more likely to occupy  
361 protected hypolithic spaces than exposed surface conditions (Table 2). This finding, while  
362 initially counterintuitive, may highlight the importance of interactions between both temperature  
363 stress and moisture availability in controlling the distribution of this species. Dryland mosses are  
364 photosynthetically efficient at low light levels, which tend to prevail in winter months when  
365 populations are hydrated [60] and overcast conditions are ideal for growth [61]. At the elevation  
366 of our study site, these periods when mosses are metabolically active are also accompanied by  
367 extreme low temperatures and significant snowfall events. Two such events occurred during our  
368 microenvironmental monitoring (Nov. 27, 2019 for 8 days and Dec. 25, 2019 for 10 days). These  
369 periods when snow covered the soil surface are evidenced by a constant difference in the  
370 temperature and RH readings from hypoliths and the soil surface, with hypoliths maintaining the

371 same RH and a slightly warmer temperature than the surface (Figs. 2-3). Thus, at our study site,  
372 *T. inermis*, which is typically found at lower (i.e., warmer) elevations, may benefit from the  
373 thermal protection that hypolithic spaces provide during the growing season, and its prevalence  
374 in hypoliths may reflect lower levels of cold stress tolerance compared to *S. caninervis*. Although  
375 specific composition differed in the soil surface and quartz hypolithic microhabitats, *S.*  
376 *caninervis* was abundant in both. This pattern of distinct but overlapping communities in soil  
377 surface and hypolithic microhabitats has been found in other studies of hypolithic microbial  
378 systems [55,62]. *Syntrichia caninervis* grows as a semi-continuous carpet in this Mojave Desert  
379 site and frequently occurs in fully exposed microsites, as well as under the shade of shrubs  
380 [63,64]. This suggests that *S. caninervis* is perhaps more tolerant and physiologically plastic  
381 while *T. inermis* is may be restricted to hypolithic microhabitats in this high elevation site at the  
382 limits of its niche.

383         This study demonstrates that the desert hypolithic microenvironment provides conditions  
384 that support a different moss species composition and different growth patterns than the  
385 prevailing surface conditions. Our findings parallel those of prior work on microbial hypoliths  
386 that has also shown a community composition distinct from surrounding soils in terms of  
387 taxonomic abundance, but filtered from the regional pool of soil taxa by conditions unique to the  
388 hypolithic niche [24,62]. Furthermore, this work expands upon our understanding of habitat  
389 partitioning and drivers of moss species diversity in desert environments. Our data suggest that  
390 in the western high elevation Mojave Desert, lower light, thermal buffering, and longer  
391 hydroperiods contribute to a higher representation of *Tortula inermis* and increased growth for  
392 the dominant moss *Syntrichia caninervis* in hypolithic microhabitats than on the soil surface.  
393 Although the hypolithic moss habitat is relatively understudied, the concept of microenvironment

394 for mosses is not a new one [10,65–67]. Even desert soil surface mosses tend to occupy specific  
395 microenvironments, such as in the shade of a shrub or on the north side of a boulder, where  
396 prevailing temperature and moisture conditions are buffered from those of the overall  
397 macroenvironment. Yet, the scale at which mosses experience their environment is probably as  
398 proportionate to their body size as the macroclimate is to macroorganisms. Landscape features  
399 such as mountain ranges are broadly appreciated for their influence on physical environmental  
400 conditions and associated species distributions; here we have shown that for smaller organisms,  
401 analogous microenvironmental features are not trivial, and can likewise influence community  
402 composition. In sum, this study reinforces the need to consider microenvironmental conditions  
403 and their variation in the characterization, prediction, and conservation of bryophyte  
404 communities.

405

## 406 **Acknowledgments**

407 We thank the students from Cal State LA and Berkeley High School who have contributed to this  
408 project.

409

## 410 **Data availability**

411 Data and analysis code have been deposited into github and made publicly available at:  
412 <https://github.com/jenna-tb-ekwealor/hypolithic-moss>.

413

## 414 **References**

- 415 1. Rosenzweig ML. A theory of habitat selection. *Ecology*. 1981;62: 327–335.
- 416 2. Gause GF. *The Struggle for Existence*. Baltimore, Maryland, USA: Williams and Wilkins  
417 Company; 1934. doi:10.1097/00010694-193602000-00018
- 418 3. Darwin CR. *On the origins of species by means of natural selection*. 6th ed. London, UK:  
419 John Murray; 1859. doi:10.1126/science.146.3640.51-b
- 420 4. Goldberg DE, Barton AM. Patterns and consequences of interspecific competition in  
421 natural communities: A review of field experiments with plants. *Am Nat*. 2017;139: 771–  
422 801.
- 423 5. Ettema CH, Wardle DA. Spatial soil ecology. *Trends Ecol Evol*. 2002;17: 177–183.  
424 doi:10.1016/S0169-5347(02)02496-5
- 425 6. Belnap J, Hawkes C V, Firestone MK. Boundaries in miniature: Two examples from soil.  
426 *Bioscience*. 2003;53: 739–749.
- 427 7. Proctor MCF, Oliver MJ, Wood AJ, Alpert P, Stark LR, Cleavitt NL, et al. Desiccation-  
428 tolerance in bryophytes: a review. *Bryologist*. 2007;110: 595–621. doi:10.1639/0007-  
429 2745(2007)110[595:DIBAR]2.0.CO;2
- 430 8. Zhang J, Zhang Y ming, Downing A, Cheng J hui, Zhou X bing, Zhang B chang. The  
431 influence of biological soil crusts on dew deposition in Gurbantunggut Desert,  
432 Northwestern China. *J Hydrol*. 2009;379: 220–228. doi:10.1016/j.jhydrol.2009.09.053
- 433 9. Bowker MA, Stark LR, McLetchie DN, Mishler BD. Sex expression, skewed sex ratios,  
434 and microhabitat distribution in the dioecious desert moss *Syntrichia caninervis*  
435 (Pottiaceae). *Am J Bot*. 2000;87: 517–526.
- 436 10. Herrnstadt I, Kidron GJ. Reproductive strategies of *Bryum dunense* in three microhabitats  
437 in the Negev Desert. *Bryologist*. 2005;108: 101–109. doi:10.1639/0007-

- 438 2745(2005)108[101:RSOBDI]2.0.CO;2
- 439 11. Marschall M, Proctor MCF. Are bryophytes shade plants? Photosynthetic light responses  
440 and proportions of chlorophyll a, chlorophyll b and total carotenoids. *Ann Bot.* 2004;94:  
441 593–603. doi:10.1093/aob/mch178
- 442 12. Wu N, Zhang YM, Downing A, Aanderud ZT, Tao Y, Williams S. Rapid adjustment of  
443 leaf angle explains how the desert moss, *Syntrichia caninervis*, copes with multiple  
444 resource limitations during rehydration. *Funct Plant Biol.* 2014. doi:10.1071/FP13054
- 445 13. Zheng Y, Xu M, Zhao J, Zhang B, Bei S, Hao L. Morphological adaptations to drought  
446 and reproductive strategy of the moss *Syntrichia caninervis* in the Gurbantunggut Desert,  
447 China. *Arid L Res Manag.* 2011. doi:10.1080/15324982.2011.554956
- 448 14. Koch K, Bhushan B, Barthlott W. Diversity of structure, morphology and wetting of plant  
449 surfaces. *Soft Matter.* 2008. doi:10.1039/b804854a
- 450 15. Dunn JL, Robinson SA. Ultraviolet B screening potential is higher in two cosmopolitan  
451 moss species than in a co-occurring Antarctic endemic moss: Implications of continuing  
452 ozone depletion. *Glob Chang Biol.* 2006;12: 2282–2296. doi:10.1111/j.1365-  
453 2486.2006.01283.x
- 454 16. Robinson SA, Turnbull JD, Lovelock CE. Impact of changes in natural ultraviolet  
455 radiation on pigment composition, physiological and morphological characteristics of the  
456 Antarctic moss, *Grimmia antarctici*. *Glob Chang Biol.* 2005;11: 476–489.  
457 doi:10.1111/j.1365-2486.2005.00911.x
- 458 17. Núñez-Olivera E, Arróniz-Crespo M, Martínez-Abaigar J, Tomás R, Beaucourt N.  
459 Assessing the UV-B tolerance of sun and shade samples of two aquatic bryophytes using  
460 short-term tests. *Bryologist.* 2005;108: 435–448. doi:10.1639/0007-

- 461 2745(2005)108[0435:ATUTOS]2.0.CO;2
- 462 18. Wynn-Williams DD. Potential effects of ultraviolet radiation on Antarctic primary  
463 terrestrial colonizers: cyanobacteria, algae, and cryptogams. *Ultrav Radiat Antarct Meas*  
464 *Biol Eff.* 1994;62: 243–257.
- 465 19. Robinson SA, Waterman MJ. Sunsafe bryophytes: Photoprotection from excess and  
466 damaging solar radiation. In: Hanson DT, Rice SK, editors. *Photosynthesis in Bryophytes*  
467 *and Early Land Plants.* Dordrecht: Springer Netherlands; 2014. pp. 113–130.  
468 doi:10.1007/978-94-007-6988-5\_7
- 469 20. Chan Y, Lacap DC, Lau MCY, Ha KY, Warren-Rhodes KA, Cockell CS, et al. Hypolithic  
470 microbial communities: Between a rock and a hard place. *Environ Microbiol.* 2012;14:  
471 2272–2282. doi:10.1111/j.1462-2920.2012.02821.x
- 472 21. Pointing SB. Hypolithic Communities. *Biological Soil Crusts: An Organizing Principle in*  
473 *Drylands.* 2016. pp. 199–213. doi:10.1007/978-3-319-30214-0\_11
- 474 22. Pointing SB, Belnap J. Microbial colonization and controls in dryland systems. *Nat Rev*  
475 *Microbiol.* 2012;10: 654. doi:10.1038/nrmicro2831
- 476 23. Bahl J, Lau MCY, Smith GJD, Vijaykrishna D, Cary SC, Lacap DC, et al. Ancient origins  
477 determine global biogeography of hot and cold desert cyanobacteria. *Nat Commun.*  
478 2011;2: 163. doi:10.1038/ncomms1167
- 479 24. Makhalanyane TP, Valverde A, Birkeland N-K, Cary SC, Marla Tuffin I, Cowan DA.  
480 Evidence for successional development in Antarctic hypolithic bacterial communities.  
481 *ISME J.* 2013;7: 2080–2090. doi:10.1038/ismej.2013.94
- 482 25. Wong FKY, Lacap DC, Lau MCY, Aitchison JC, Cowan DA, Pointing SB. Hypolithic  
483 microbial community of quartz pavement in the high-altitude tundra of central Tibet.

- 484 Microb Ecol. 2010;60: 730–739. doi:10.1007/s00248-010-9653-2
- 485 26. Cockell CS, Stokes MD. Hypolithic colonization of opaque rocks in the Arctic and  
486 Antarctic polar desert. Arctic, Antarct Alp Res. 2006;38: 335–342. doi:10.1657/1523-  
487 0430(2006)38[335:HCOORI]2.0.CO;2
- 488 27. Cowan DA, Khan N, Pointing SB, Cary SC. Diverse hypolithic refuge communities in the  
489 McMurdo Dry Valleys. Antarct Sci. 2010;22: 714–720. doi:10.1017/S0954102010000507
- 490 28. Cowan DA, Sohm JA, Makhalanyane TP, Capone DG, Green TGA, Cary SC, et al.  
491 Hypolithic communities: Important nitrogen sources in Antarctic desert soils. Environ  
492 Microbiol Rep. 2011;3: 581–586. doi:10.1111/j.1758-2229.2011.00266.x
- 493 29. de los Ríos A, Cary C, Cowan D. The spatial structures of hypolithic communities in the  
494 Dry Valleys of East Antarctica. Polar Biol. 2014;37: 1823–1833. doi:10.1007/s00300-  
495 014-1564-0
- 496 30. Werger MJA, During HJ. A subterranean moss greenhouse in the Californian desert.  
497 Bryologist. 1989;92: 411–412.
- 498 31. Müller G. Hypolithic plants from Carruthers Peak, Snowy Mountains, New South Wales,  
499 Australia. Geogr Res. 2009;47: 449–453. doi:10.1111/j.1745-5871.2009.00591.x
- 500 32. Cridland AA. The habitat of *Aschisma kansanum*. Bryologist. 1959;62: 132–135.  
501 Available: <http://www.jstor.org/stable/3240032>
- 502 33. Schlesinger WH, Phippen JS, Wallenstein MD, Hofmockel KS, Klepeis DM, Mahall BE.  
503 Community composition and photosynthesis by photoautotrophs under quartz pebbles,  
504 southern Mojave Desert. Ecology. 2003;84: 3222–3231. doi:10.1890/02-0549
- 505 34. Mishler BD. *Syntrichia*. In: Committee F of NAE, editor. Flora of North America North of  
506 Mexico, vol 27. Oxford, England, United Kingdom: Oxford University Press; 2007. pp.

- 507 618–627.
- 508 35. Malcolm B, Malcolm N, Shevock J, Norris D. California Mosses. Nelson, New Zealand:  
509 Micro-Optics Press; 2009.
- 510 36. Norris DH, Shevock JR. Contributions toward a bryoflora of California: II. A key to the  
511 mosses. Madrono. 2004;51: 133–269. Available: <http://www.jstor.org/stable/41425542>
- 512 37. Fisher R. Statistical methods for research workers. 5th ed. Oliver, Boyd, editors.  
513 Biological monographs and manuals. Edinburgh: Genesis Publishing; 1934.
- 514 38. Shapiro SS, Wilk MB. An analysis of variance test for normality (complete samples).  
515 Biometrika. 1965. doi:10.2307/2333709
- 516 39. Wilcoxon F. Wilcoxon ranking test for unpaired measurements. Biometrics Bull. 1945;1:  
517 80.
- 518 40. Saucedo C, Wolfe C. Winter storm delivers a white Christmas in SoCal mountains.  
519 KTLA5. 23 Dec 2019.
- 520 41. Von Quednow C. Storm dumps 3 feet of snow in 24 hours at Mountain High in  
521 Wrightwood, prompting closure. KTLA5. 26 Dec 2019.
- 522 42. Wigglesworth A, Lin II R-G. Atmospheric river bringing new storm with rain and snow to  
523 California. The Los Angeles Times. 29 Nov 2019.
- 524 43. Lin II R-G, Fry H. Rain and snow likely to break California’s most enduring  
525 Thanksgiving tradition: Perfect weather. The Los Angeles Times. 26 Nov 2019.
- 526 44. Cove DJ, Schild A, Ashton NW, Hartmann E. Genetic and physiological studies of the  
527 effect of light on the development of the moss, *Physcomitrella patens*. Photochem  
528 Photobiol. 1978. doi:10.1111/j.1751-1097.1978.tb07596.x
- 529 45. Tracy CR, Streten-Joyce C, Dalton R, Nussear KE, Gibb KS, Christian KA. Microclimate



- 530 and limits to photosynthesis in a diverse community of hypolithic cyanobacteria in  
531 northern Australia. *Environ Microbiol.* 2010;12: 592–607. doi:10.1111/j.1462-  
532 2920.2009.02098.x
- 533 46. Weber B, Wessels DC, Deutschewitz K, Dojani S, Reichenberger H, Büdel B. Ecological  
534 characterization of soil-inhabiting and hypolithic soil crusts within the Knersvlakte, South  
535 Africa. *Ecol Process.* 2013;2: 8. doi:10.1186/2192-1709-2-8
- 536 47. Cockell CS, McKay CP, Warren-Rhodes K, Horneck G. Ultraviolet radiation-induced  
537 limitation to epilithic microbial growth in arid deserts - Dosimetric experiments in the  
538 hyperarid core of the Atacama Desert. *J Photochem Photobiol B Biol.* 2008.  
539 doi:10.1016/j.jphotobiol.2007.11.009
- 540 48. Takács Z, Csintalan Z, Sass L, Laitat E, Vass I, Tuba Z. UV-B tolerance of bryophyte  
541 species with different degrees of desiccation tolerance. *Journal of Photochemistry and*  
542 *Photobiology B: Biology.* 1999. pp. 210–215. doi:10.1016/S1011-1344(99)00029-9
- 543 49. Warren-Rhodes KA, Rhodes KL, Pointing SB, Ewing SA, Lacap DC, Gómez-Silva B, et  
544 al. Hypolithic cyanobacteria, dry limit of photosynthesis, and microbial ecology in the  
545 hyperarid Atacama Desert. *Microb Ecol.* 2006. doi:10.1007/s00248-006-9055-7
- 546 50. Stark LR. Phenology and reproductive biology of *Syntrichia inermis* (Bryopsida,  
547 Pottiaceae) in the Mojave Desert. *Bryologist.* 1997;100: 13–27.
- 548 51. Alpert P. Desiccation of desert mosses following a summer rainstorm. *Bryologist.*  
549 2017;82: 65–71. Available: <http://www.jstor.org/stable/3241969>
- 550 52. Stark LR. Phenology of patch hydration, patch temperature and sexual reproductive output  
551 over a four-year period in the desert moss *Crossidium crassinerve*. *J Bryol.* 2005;27: 231–  
552 240. doi:10.1179/174328205X69977

- 553 53. Coe KK, Belnap J, Sparks JP. Precipitation-driven carbon balance controls survivorship of  
554 desert biocrust mosses. *Ecology*. 2012;93: 1626–1636.
- 555 54. Smith MC, Bowman JP, Scott FJ, Line MA. Sublithic bacteria associated with Antarctic  
556 quartz stones. *Antarct Sci*. 2000;12: 177–184. doi:10.1017/S0954102000000237
- 557 55. Wei STS, Lacap-Bugler DC, Lau MCY, Caruso T, Rao S, de los Rios A, et al. Taxonomic  
558 and functional diversity of soil and hypolithic microbial communities in Miers Valley,  
559 McMurdo Dry Valleys, Antarctica. *Front Microbiol*. 2016. doi:10.3389/fmicb.2016.01642
- 560 56. Bates JW. Mineral nutrient acquisition and retention by bryophytes. *J Bryol*. 1992.  
561 doi:10.1179/jbr.1992.17.2.223
- 562 57. Lacap-Bugler DC, Lee KK, Archer S, Gillman LN, Lau MCY, Leuzinger S, et al. Global  
563 diversity of desert hypolithic cyanobacteria. *Front Microbiol*. 2017.  
564 doi:10.3389/fmicb.2017.00867
- 565 58. Vikram S, Guerrero LD, Makhalanyane TP, Le PT, Seely M, Cowan DA. Metagenomic  
566 analysis provides insights into functional capacity in a hyperarid desert soil niche  
567 community. *Environ Microbiol*. 2016. doi:10.1111/1462-2920.13088
- 568 59. Fisher K, Jefferson JS, Vaishampayan P. Bacterial Communities of Mojave Desert  
569 Biological Soil Crusts Are Shaped by Dominant Photoautotrophs and the Presence of  
570 Hypolithic Niches. *Front Ecol Evol*. 2020. doi:10.3389/fevo.2019.00518
- 571 60. Alpert P, Oechel WC. Comparative patterns of net photosynthesis in an assemblage of  
572 mosses with contrasting microdistributions. *Am J Bot*. 1987;74: 1787–1796.
- 573 61. Alpert P, Oechel WC. Carbon balance limits the microdistribution of *Grimmia laevigata*,  
574 a desiccation-tolerant plant. *Ecol Soc Am*. 1985;66: 660–669.
- 575 62. Stomeo F, Valverde A, Pointing SB, McKay CP, Warren-Rhodes KA, Tuffin MI, et al.

- 576 Hypolithic and soil microbial community assembly along an aridity gradient in the Namib  
577 Desert. *Extremophiles*. 2013. doi:10.1007/s00792-013-0519-7
- 578 63. Baughman JT, Payton AC, Paasch AE, Fisher KM, McDaniel SF. Multiple factors  
579 influence population sex ratios in the Mojave Desert moss *Syntrichia caninervis*. *Am J*  
580 *Bot*. 2017. doi:10.3732/ajb.1700045
- 581 64. Paasch AE, Mishler BD, Nosratinia S, Stark LR, Fisher KM. Decoupling of sexual  
582 reproduction and genetic diversity in the female-biased Mojave Desert moss *Syntrichia*  
583 *caninervis* (Pottiaceae). *Int J Plant Sci*. 2015.
- 584 65. Mills SE, Macdonald SE. Factors influencing bryophyte assemblage at different scales in  
585 the Western Canadian boreal forest. *Bryologist*. 2005;108: 86–100. doi:Article
- 586 66. Hamerlynck EP, Csintalan Z, Nagy Z, Tuba Z, Goodin D, Henebry GM. Ecophysiological  
587 consequences of contrasting microenvironments on the desiccation tolerant moss *Tortula*  
588 *ruralis*. *Oecologia*. 2002;131: 498–505. doi:10.1007/s00442-002-0925-5
- 589 67. Mishler BD. The biology of bryophytes: Bryophytes aren't just small tracheophytes. *Am J*  
590 *Bot*. 2001;88: 2129–2131.
- 591

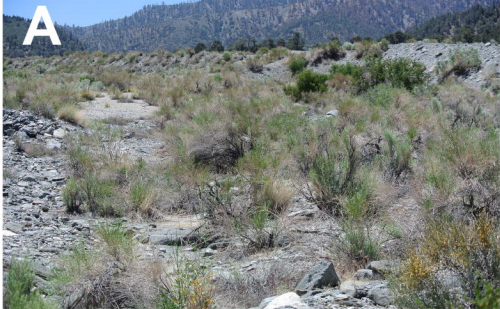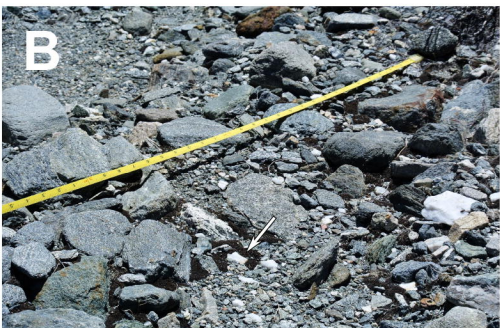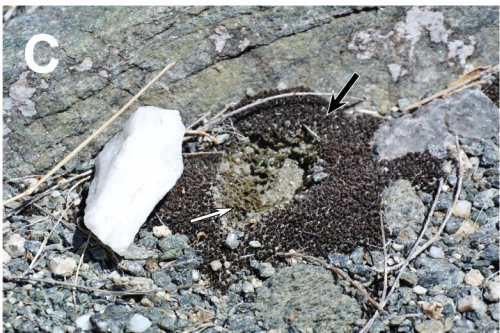

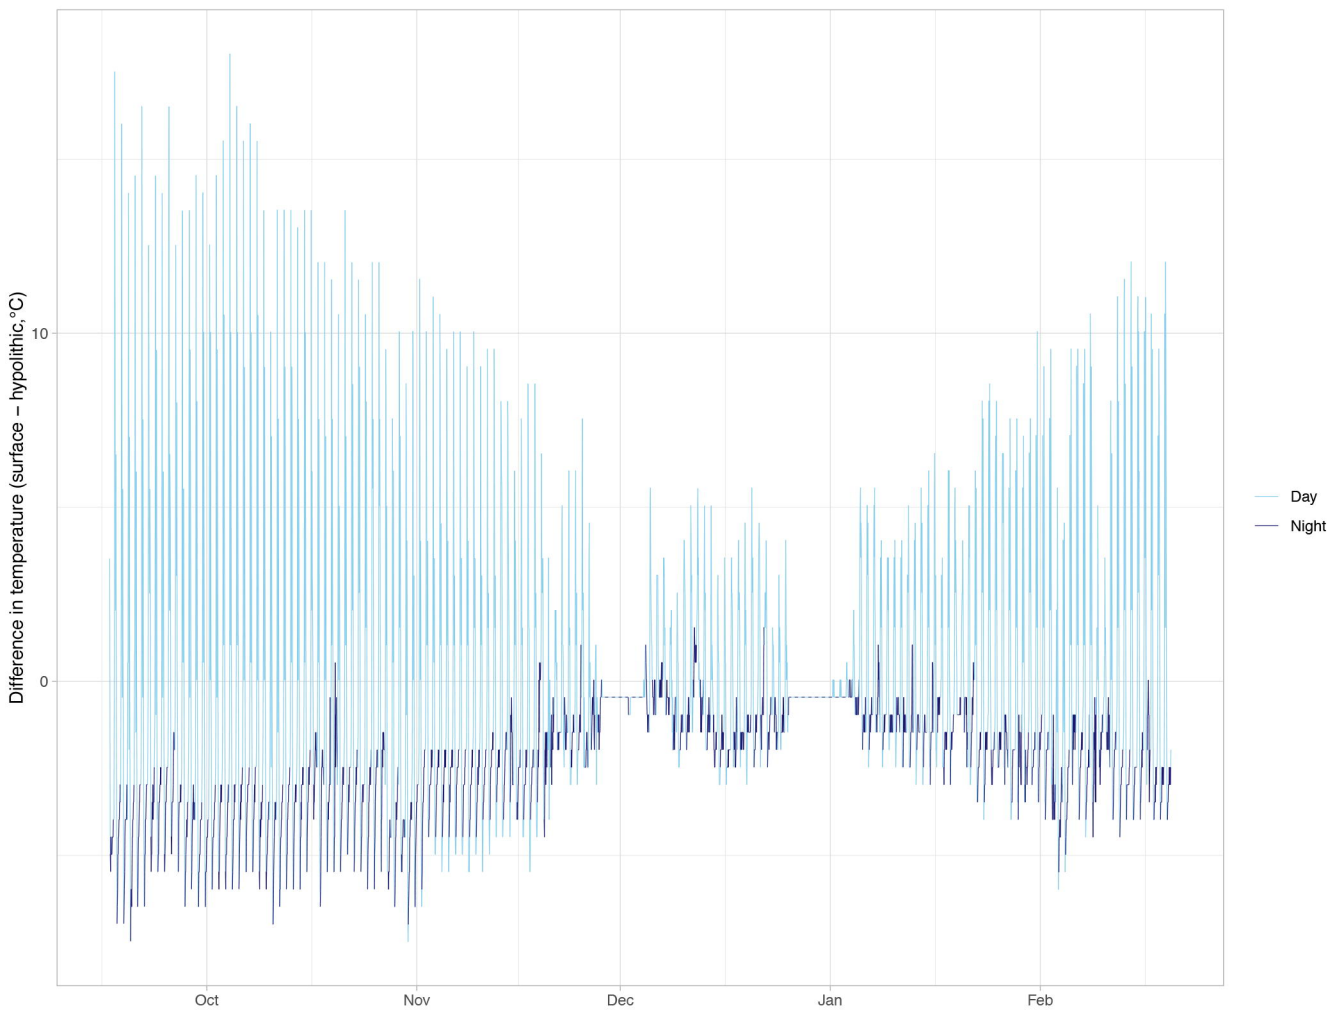

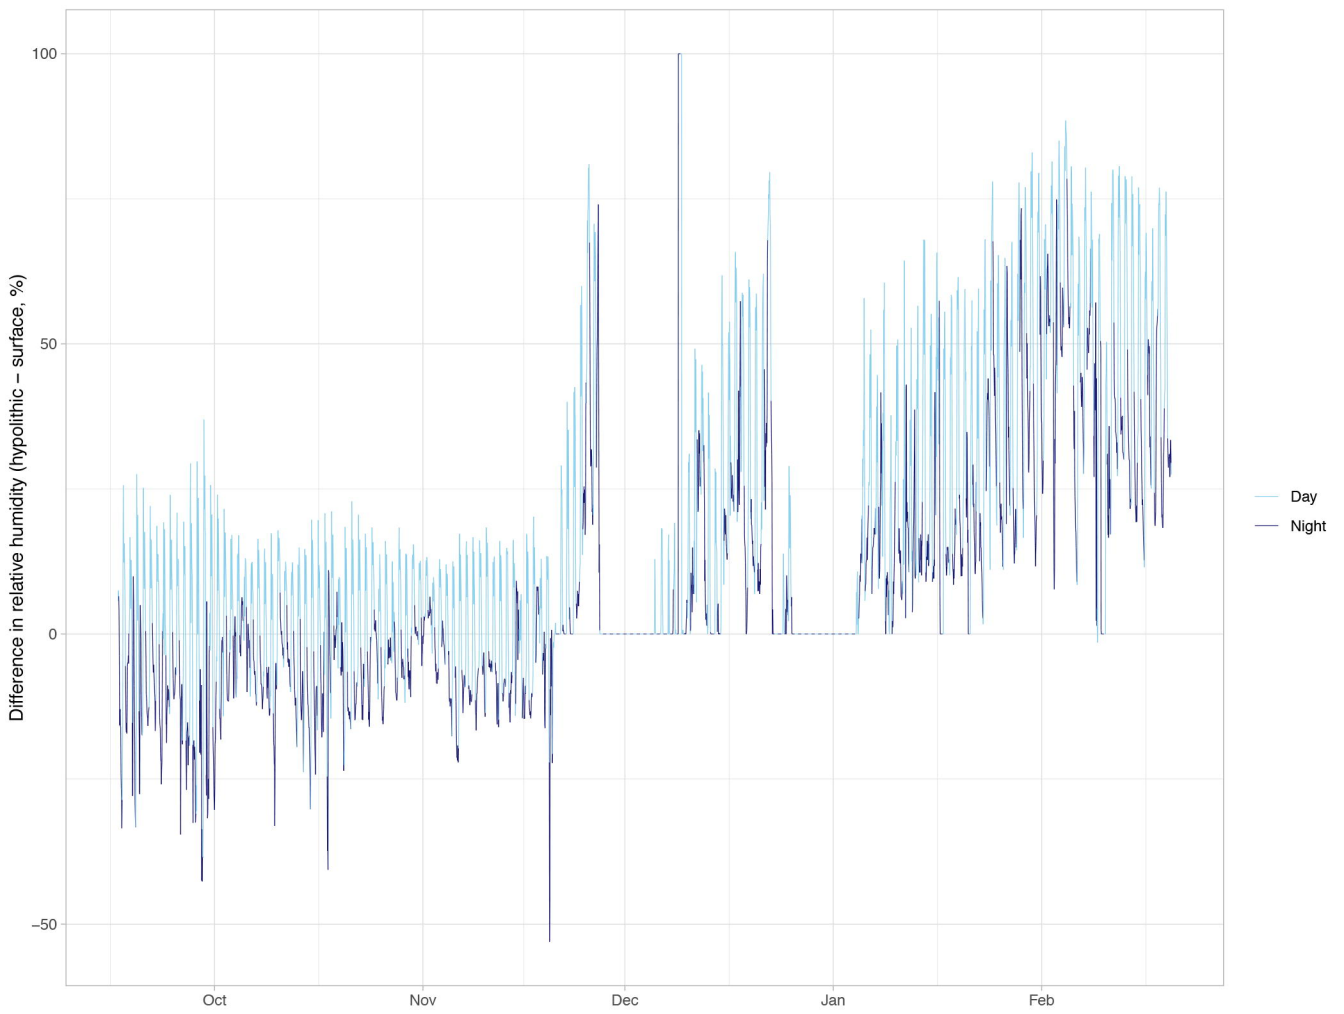

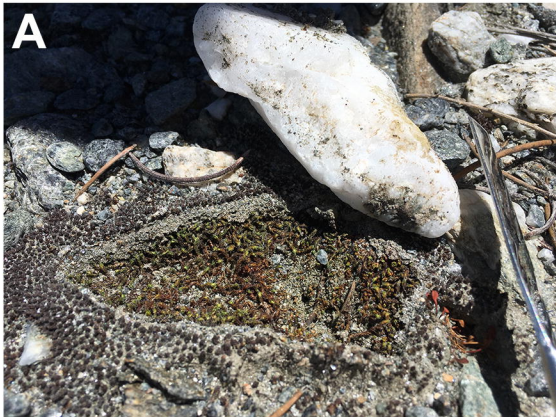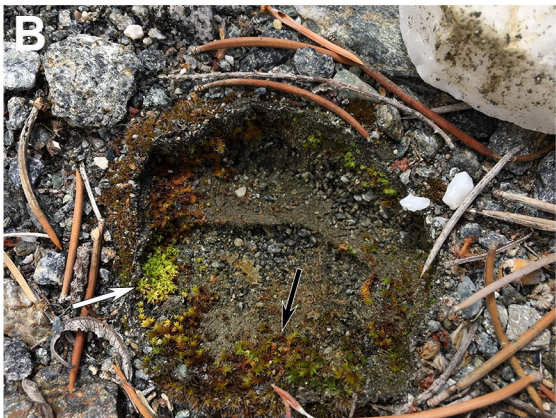

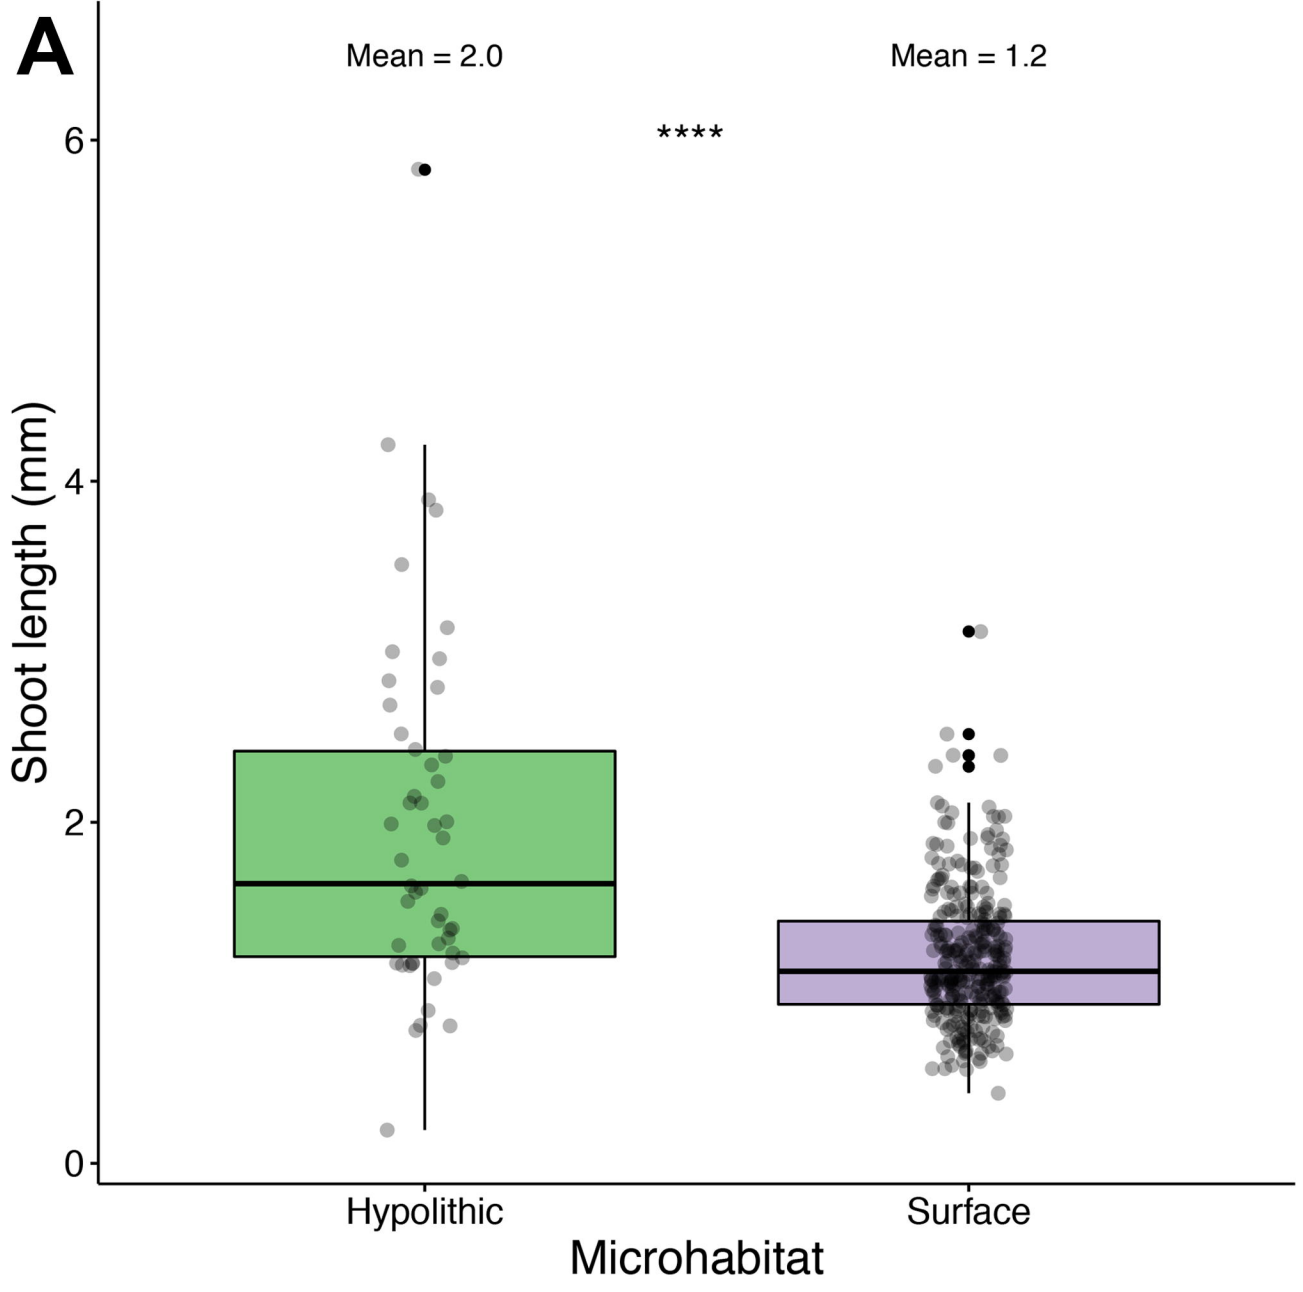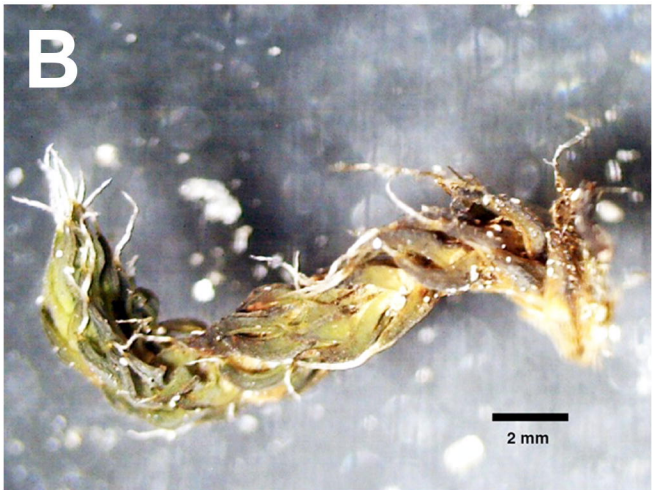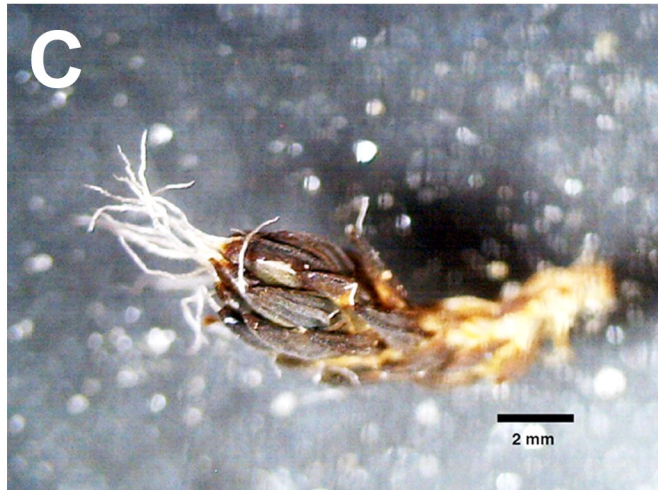



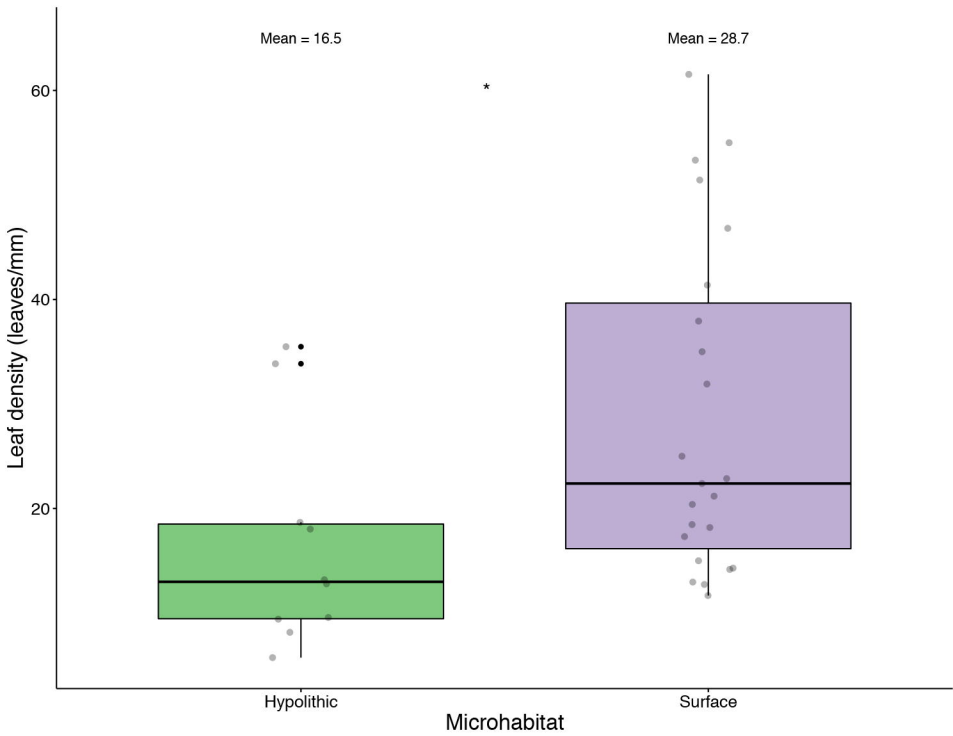

Source: https://www.biorxiv.org/content/10.1101/2020.06.17.157941v1.full.pdf
